# Supplementary material for: The effect of metformin on culture conversion in tuberculosis patients with diabetes mellitus
Source: PubMed Central journal article supplement — Korean J Intern Med. 2018 Mar 16;33(5):933–40. doi: 10.3904/kjim.2017.249 (PMC6129638; doi:10.3904/kjim.2017.249), 2018-03-16
Supplement: kjim-2017-249-suppl1.pdf [file kjim-2017-249-suppl1.pdf]

**Supplementary Table 1. Multivariate logistic regression analysis for factors associated with sputum AFB culture conversion at 2 months in patients in whom have not cavity**

| Variable                 | AFB culture conversion at 2 months |                |
|--------------------------|------------------------------------|----------------|
|                          | OR (95% CI)                        | <i>p</i> value |
| Age                      | 0.97 (0.91–1.04)                   | 0.44           |
| glucose                  | 0.99 (0.99–1.00)                   | 0.11           |
| CCR                      | 0.99 (0.96–1.01)                   | 0.22           |
| Metformin                | 1.65 (0.38–7.17)                   | 0.50           |
| Previous TB history      | 0.64 (0.91–4.55)                   | 0.87           |
| AFB smear grade (ref. 0) |                                    |                |
| Grade 1 vs. 0            | 0.08 (0.01–0.82)                   | 0.03           |
| Grade 2 vs. 0            | 0.31 (0.00–0.50)                   | 0.01           |
| Grade 3 vs. 0            | 0.11 (0.01–0.90)                   | 0.04           |
| Grade 4 vs. 0            | 0.58 (0.39–8.71)                   | 0.69           |
| Drug resistance          | 0.38 (0.05–2.97)                   | 0.36           |

AFB, acid-fast bacilli; OR, odds ratio; CI, confidence interval; CCR, creatinine clearance; TB, tuberculosis.
